# Supplementary material
Source: PubMed Central journal article supplement (PMC4248688)
Supplement: EC.00215-14_zek999094363so1.pdf [file EC.00215-14_zek999094363so1.pdf]

# SUPPLEMENTARY FIGURES

## S1.

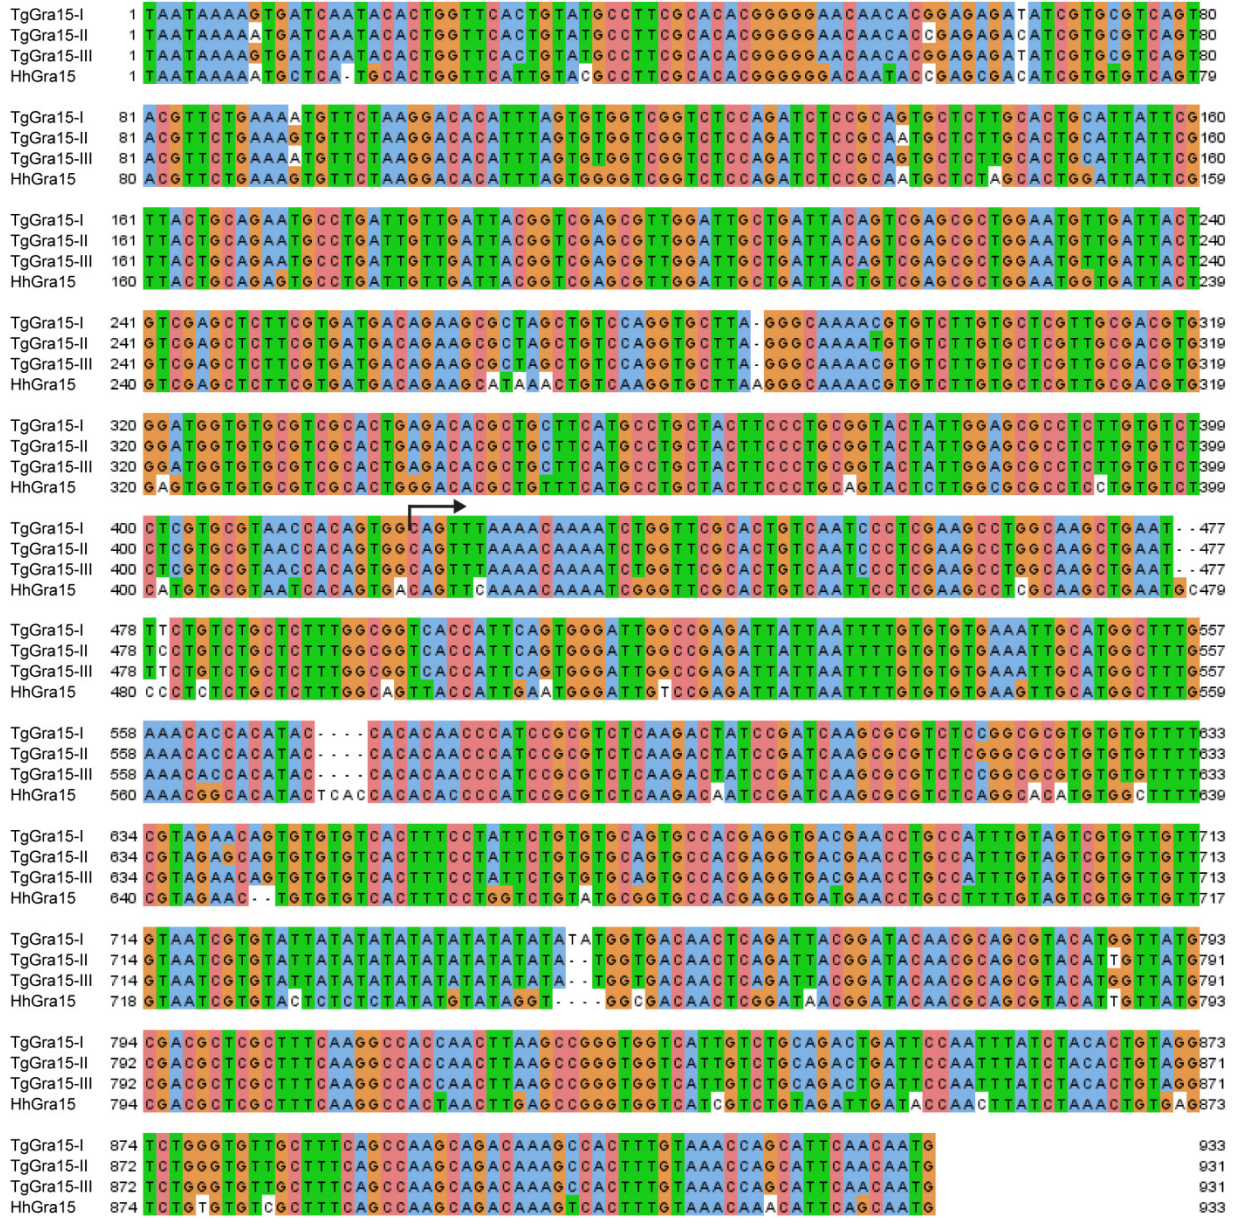

Figure S1: Alignment of the predicted promoters of *GRA15* in *T. gondii*-I,II,III and *H. hammondi*. These are the same upstream regions used in luciferase reporter assays. An arrowhead indicates the putative transcriptional start site.

S2.

|             |     |                                                                                                                         |     |
|-------------|-----|-------------------------------------------------------------------------------------------------------------------------|-----|
| TgGra15-I   | 1   | MVT TTTPT P P P G A P A V V P I F D V V Y Q L N P H V F R S R F S R R N R A R R V V S S K S R S I I R W L G Y L T       | 60  |
| TgGra15-II  | 1   | ..... - ..... A                                                                                                         | 59  |
| TgGra15-III | 1   | ..... V                                                                                                                 | 60  |
| HhGra15     | 1   | ..... R ..... D ..... M ..... Q ..... H ..... G A ..... K ..... S                                                       | 60  |
|             |     |                                                                                                                         |     |
| TgGra15-I   | 61  | V L A A V I L L G A Y A V R R L S R D L S D S V R E T R R G R R I T G S V P P G T T R P R S E S C T G T Q V D G G C G A | 120 |
| TgGra15-II  | 60  | ..... V                                                                                                                 | 119 |
| TgGra15-III | 61  | .....                                                                                                                   | 120 |
| HhGra15     | 61  | ..... I ..... P ..... Q ..... A ..... G ..... P ..... A H ..... S L N A ..... S ..... N ..... Y V                       | 120 |
|             |     |                                                                                                                         |     |
| TgGra15-I   | 121 | D T S T D G K S E S E Q T E N G E D S R F S T R T P I H V T A S T S P F A T R K A A E E R S S S P R D R K V P E G A Q L | 180 |
| TgGra15-II  | 120 | .....                                                                                                                   | 179 |
| TgGra15-III | 121 | .....                                                                                                                   | 180 |
| HhGra15     | 121 | E ..... A ..... T F ..... R ..... A ..... I ..... T ..... P ..... S ..... Q ..... K ..... H ..... I ..... S ..... R     | 180 |
|             |     |                                                                                                                         |     |
| TgGra15-I   | 181 | P T S S T P H A Q R K D S G S D S R N P S T L I P S P G T N T F N M N F Y I I G A G S S A L D F I F P H T P D A Q A T V | 240 |
| TgGra15-II  | 180 | .....                                                                                                                   | 239 |
| TgGra15-III | 181 | .....                                                                                                                   | 240 |
| HhGra15     | 181 | T P T P T ..... D N ..... D ..... S ..... S ..... S V L R ..... T ..... A                                               | 240 |
|             |     |                                                                                                                         |     |
| TgGra15-I   | 241 | V S P P R S A A A A P T V E T V P R V R T Y S T P T T L L P T A P A T A T S N H M H A S A T P S P P E R P Q N F R G G   | 300 |
| TgGra15-II  | 240 | .....                                                                                                                   | 299 |
| TgGra15-III | 241 | ..... L ..... V                                                                                                         | 300 |
| HhGra15     | 241 | ..... T P ..... G ..... H ..... T ..... T ..... R ..... P                                                               | 300 |
|             |     |                                                                                                                         |     |
| TgGra15-I   | 301 | L M R Q N G M V E G T S L T T T E A G M P A P L Q S P Q H I E T E A R L T Y S N H L K S P H T P E T P T V H S I D P V V | 360 |
| TgGra15-II  | 300 | .....                                                                                                                   | 359 |
| TgGra15-III | 301 | ..... S ..... T                                                                                                         | 360 |
| HhGra15     | 301 | ..... E ..... P ..... S D ..... I ..... G ..... P ..... L G ..... F ..... P ..... L ..... Q ..... Q ..... F             | 360 |
|             |     |                                                                                                                         |     |
| TgGra15-I   | 361 | G T S G H S V A V G S Q S P A G G P P T D S R T P A A L T P T S S S F S H A D S L E T S E H P Q S G P S L H P L I S G I | 420 |
| TgGra15-II  | 360 | .....                                                                                                                   | 419 |
| TgGra15-III | 361 | .....                                                                                                                   | 420 |
| HhGra15     | 361 | ..... S T ..... L ..... I ..... H I ..... S ..... P ..... V                                                             | 420 |
|             |     |                                                                                                                         |     |
| TgGra15-I   | 421 | Q D A V Q S Q L P L S Q Q E T L P V V E N A T F F G P Q Q T P P W M D E T A A A A I P L A P S Q P G S R T Q P I S S P H | 480 |
| TgGra15-II  | 420 | .....                                                                                                                   | 479 |
| TgGra15-III | 421 | .....                                                                                                                   | 480 |
| HhGra15     | 421 | ..... K ..... K ..... L ..... E ..... T V T ..... P ..... H ..... T ..... A N                                           | 480 |
|             |     |                                                                                                                         |     |
| TgGra15-I   | 481 | T L L P L S G G V S A V P G P P R T E N P R Q P Q V P G E N S Y Y S V P T E P Y P A Q D M S P L I R G T H S Q T E T V E | 540 |
| TgGra15-II  | 480 | ..... S R ..... - - - - -                                                                                               | 517 |
| TgGra15-III | 481 | ..... P L                                                                                                               | 540 |
| HhGra15     | 481 | ..... P S R ..... G ..... T ..... A ..... S ..... T P ..... G A                                                         | 540 |
|             |     |                                                                                                                         |     |
| TgGra15-I   | 541 | C G V N A S S E G L A A G A P S S K S A E N A Q T G Q G A G K S L L P V F L H P Q E Q S P H S M P T L G A G R F G S G E | 600 |
| TgGra15-II  |     | .....                                                                                                                   |     |
| TgGra15-III | 541 | .....                                                                                                                   | 600 |
| HhGra15     | 541 | ..... V ..... V ..... T ..... E I I ..... S ..... R ..... F P ..... R ..... R                                           | 600 |
|             |     |                                                                                                                         |     |
| TgGra15-I   | 601 | L Q R T I S D P G P Q R A G A T Q A D G I G A G G P R D T Q S A V T P                                                   | 635 |
| TgGra15-II  | 518 | - - ..... A                                                                                                             | 550 |
| TgGra15-III | 601 | .....                                                                                                                   | 635 |
| HhGra15     | 601 | ..... L ..... E ..... S ..... D ..... G                                                                                 | 635 |

Figure S2. Alignment of the predicted protein sequence region of GRA15 in *T. gondii*-I,II,III and *H. hammondi*. Polymorphisms unique to types II and III are indicated in green and blue, respectively. There are no GRA15 polymorphisms unique to *T. gondii* Type I. Sites in *H. hammondi* GRA15 that are the same as Type II at unique polymorphic sites are also colored green. There were no Type III-specific polymorphisms that were conserved in HhGRA15.



S3.

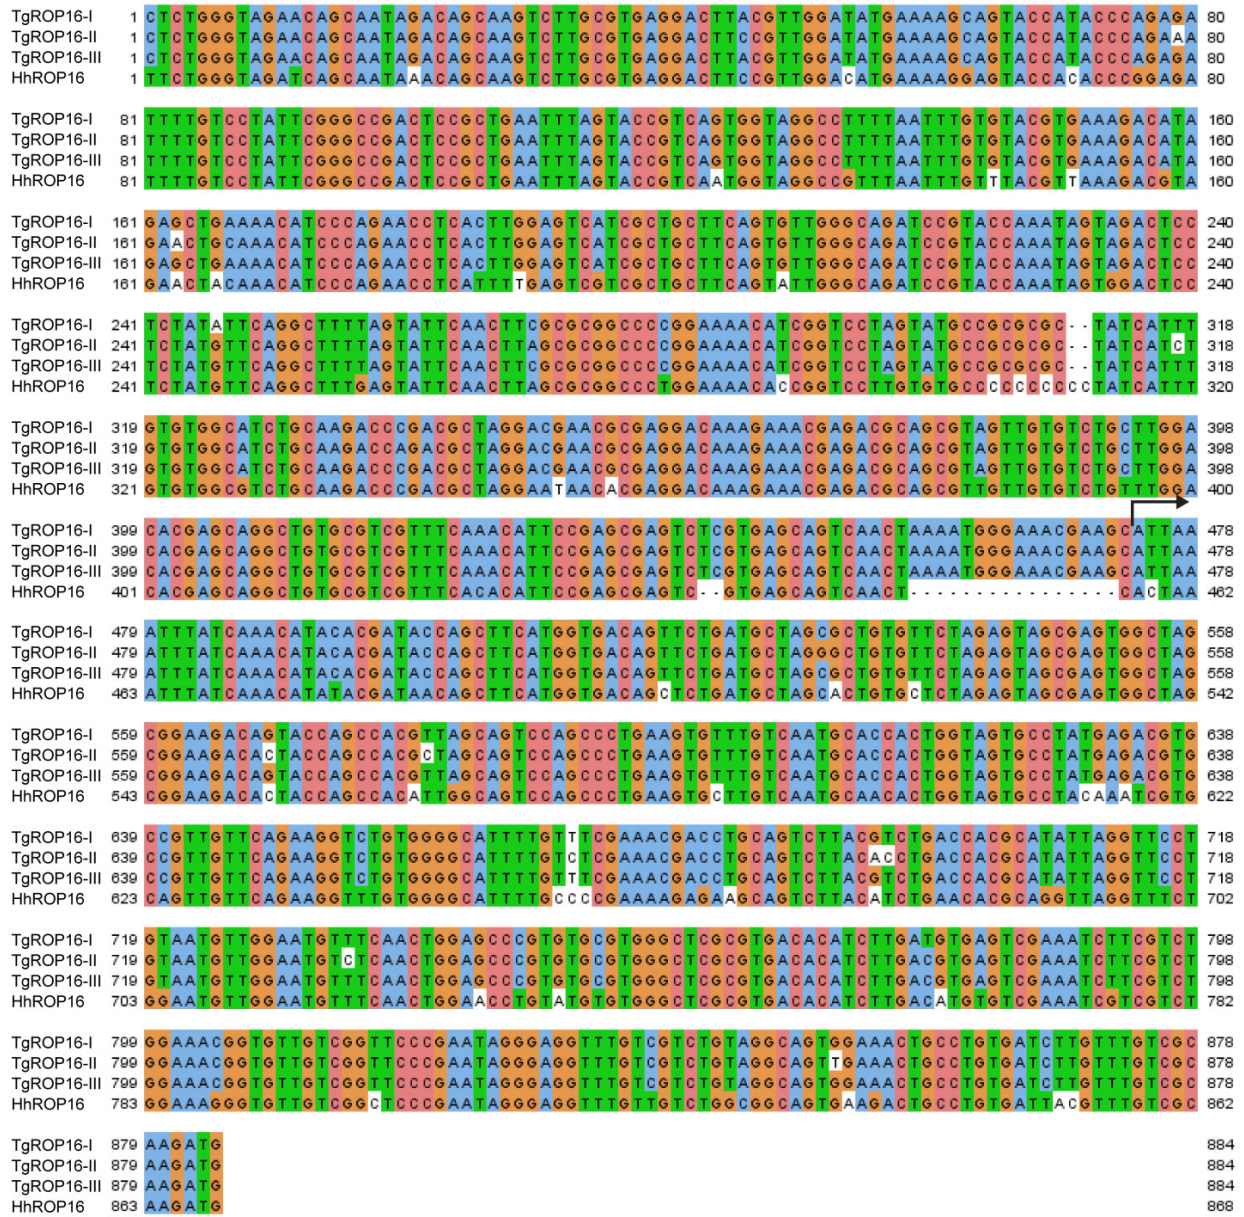

Figure S3. Alignment of the predicted *ROP16* promoters for *T. gondii*-I,II,III and *H. hammondi*. These are the same upstream regions used in luciferase reporter assays. Putative transcriptional start site is indicated by an arrowhead.

S4.

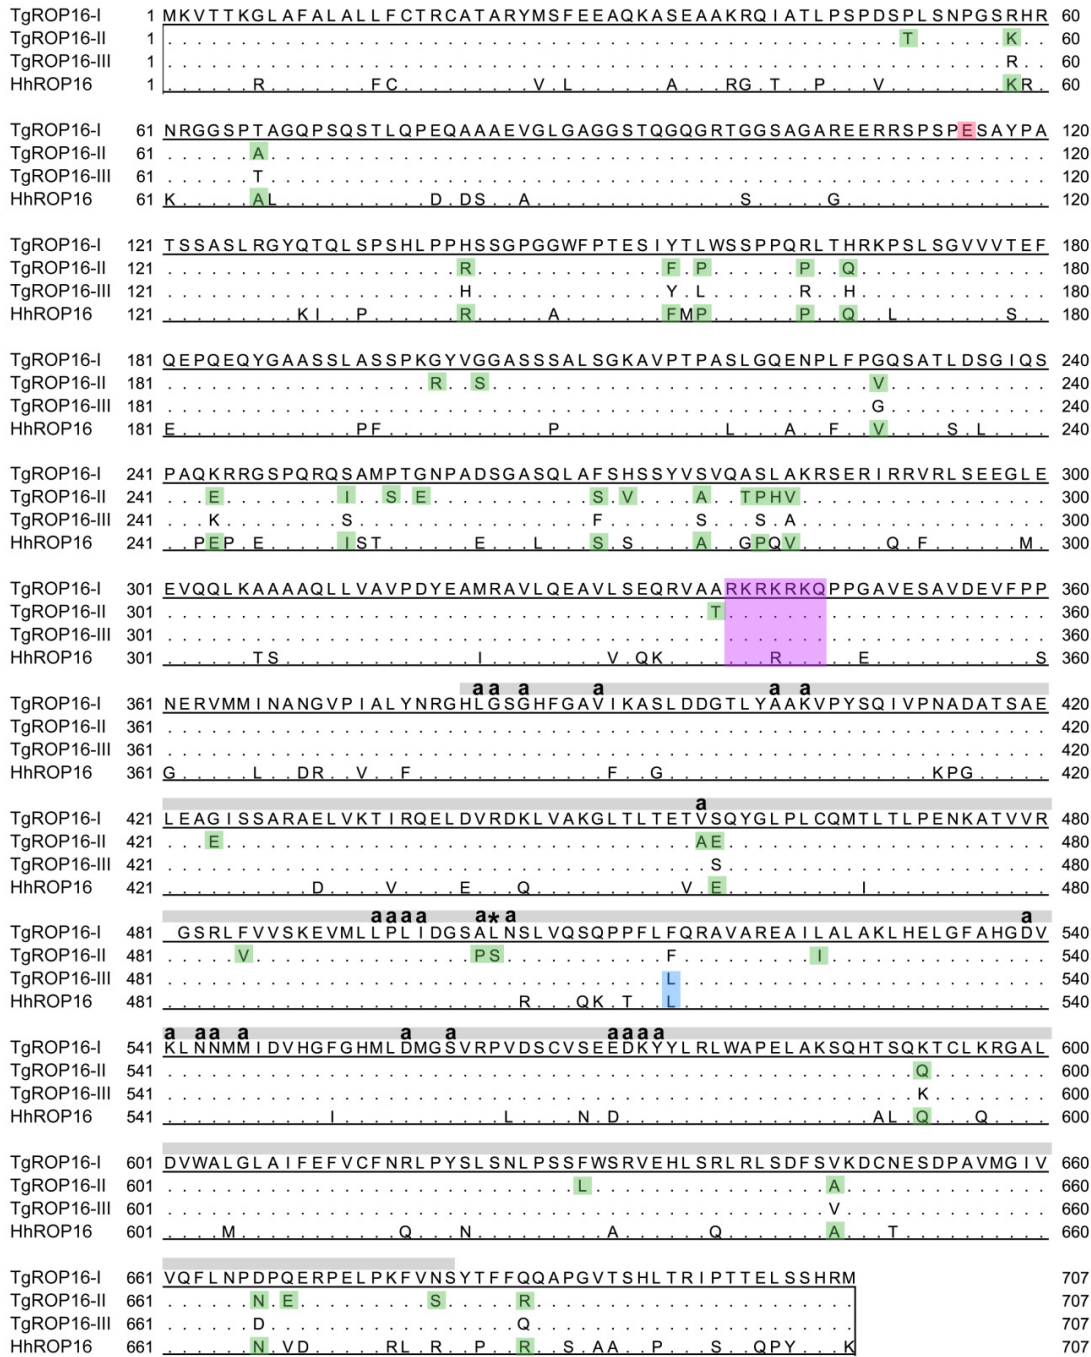

Figure S4. Alignment of the predicted protein sequence region of ROP16 in *T. gondii*-I,II,III and *H. hammondi*. Polymorphisms unique to types I, II and III are indicated in red, green and blue, respectively. At sites with unique polymorphisms in any of the 3 lineages, the *H. hammondi* sequence is also colored red, green or blue if it has the same amino acid at that site. The predicted class 4 NLS is highlighted in magenta. The kinase domain is indicated by the grey bar above the alignment, with active or ATP binding sites indicated by "a". The polymorphic leucine residue required for ROP16-driven STAT3 phosphorylation in TgROP16<sub>I,III</sub> is indicated by an asterisk.

S5.

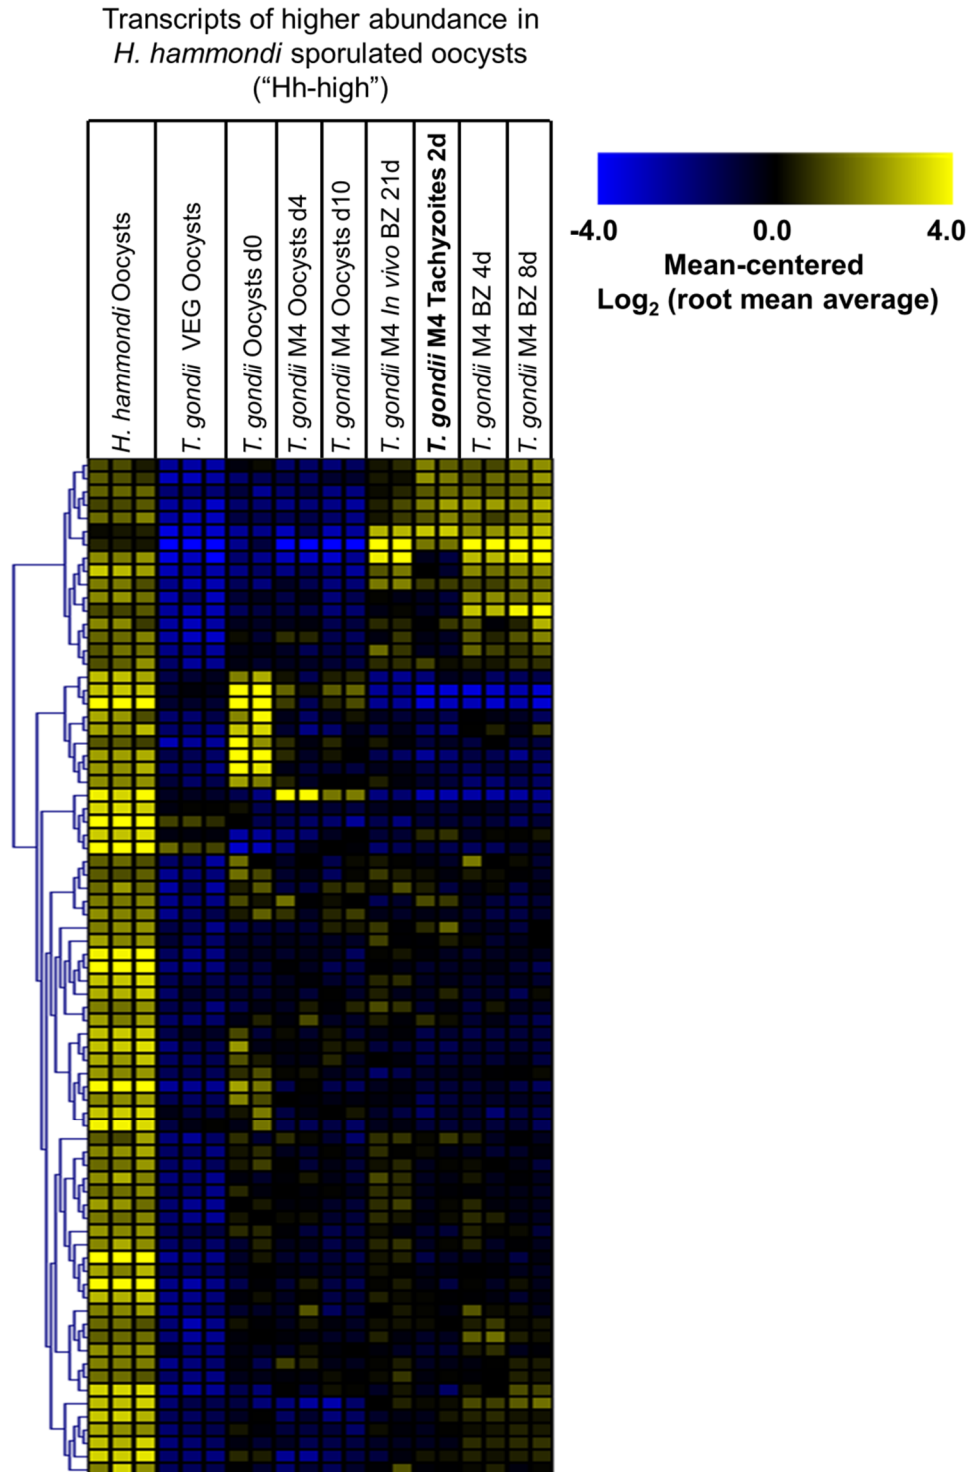

Figure S5. Heatmap of mean-centered, normalized data for *H. hammondi* HhGer041 and *T. gondii* VEG sporozoites showing genes with transcripts that were of higher abundance (FDR  $P < 0.01$ ) in *H. hammondi* compared to *T. gondii* VEG ("Hh-high"). Data from multiple life cycle stages of *T. gondii* strain M4 are shown for comparison. A subset of these genes (top cluster) are developmentally regulated during the tachyzoite to bradyzoite transition in *T. gondii* strain M4.

S6.

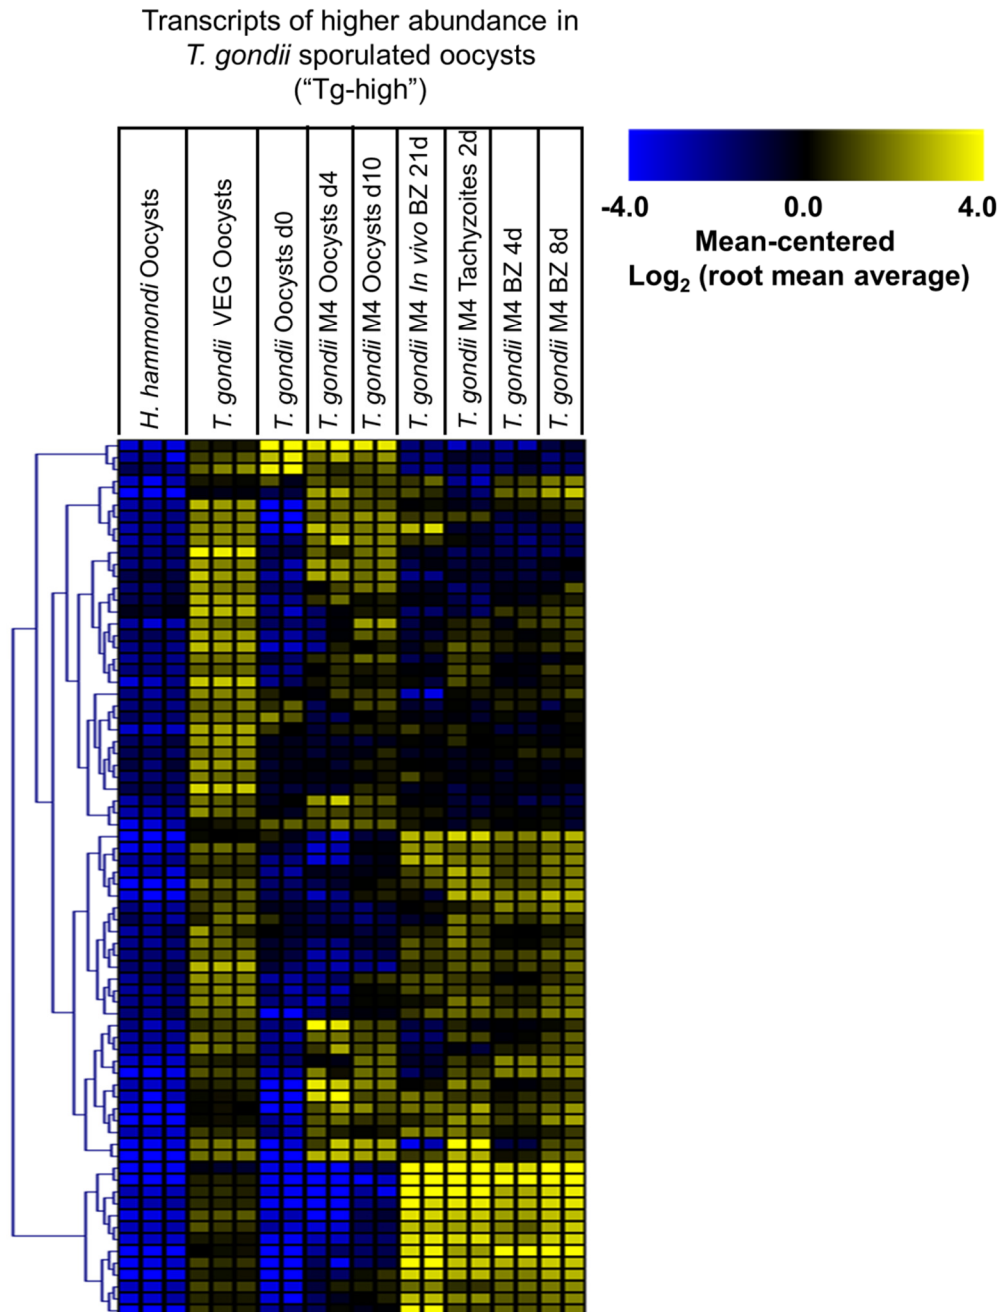

Figure S6. Heatmap of mean-centered, normalized data for *H. hammondi* HhCatGer041 and *T. gondii* VEG sporozoites showing genes with transcripts that were of higher abundance (FDR  $P < 0.01$ ) in *T. gondii* VEG compared to *H. hammondi* ("Tg-high"). Data from multiple life cycle stages of *T. gondii* strain M4 are shown for comparison.



S7.

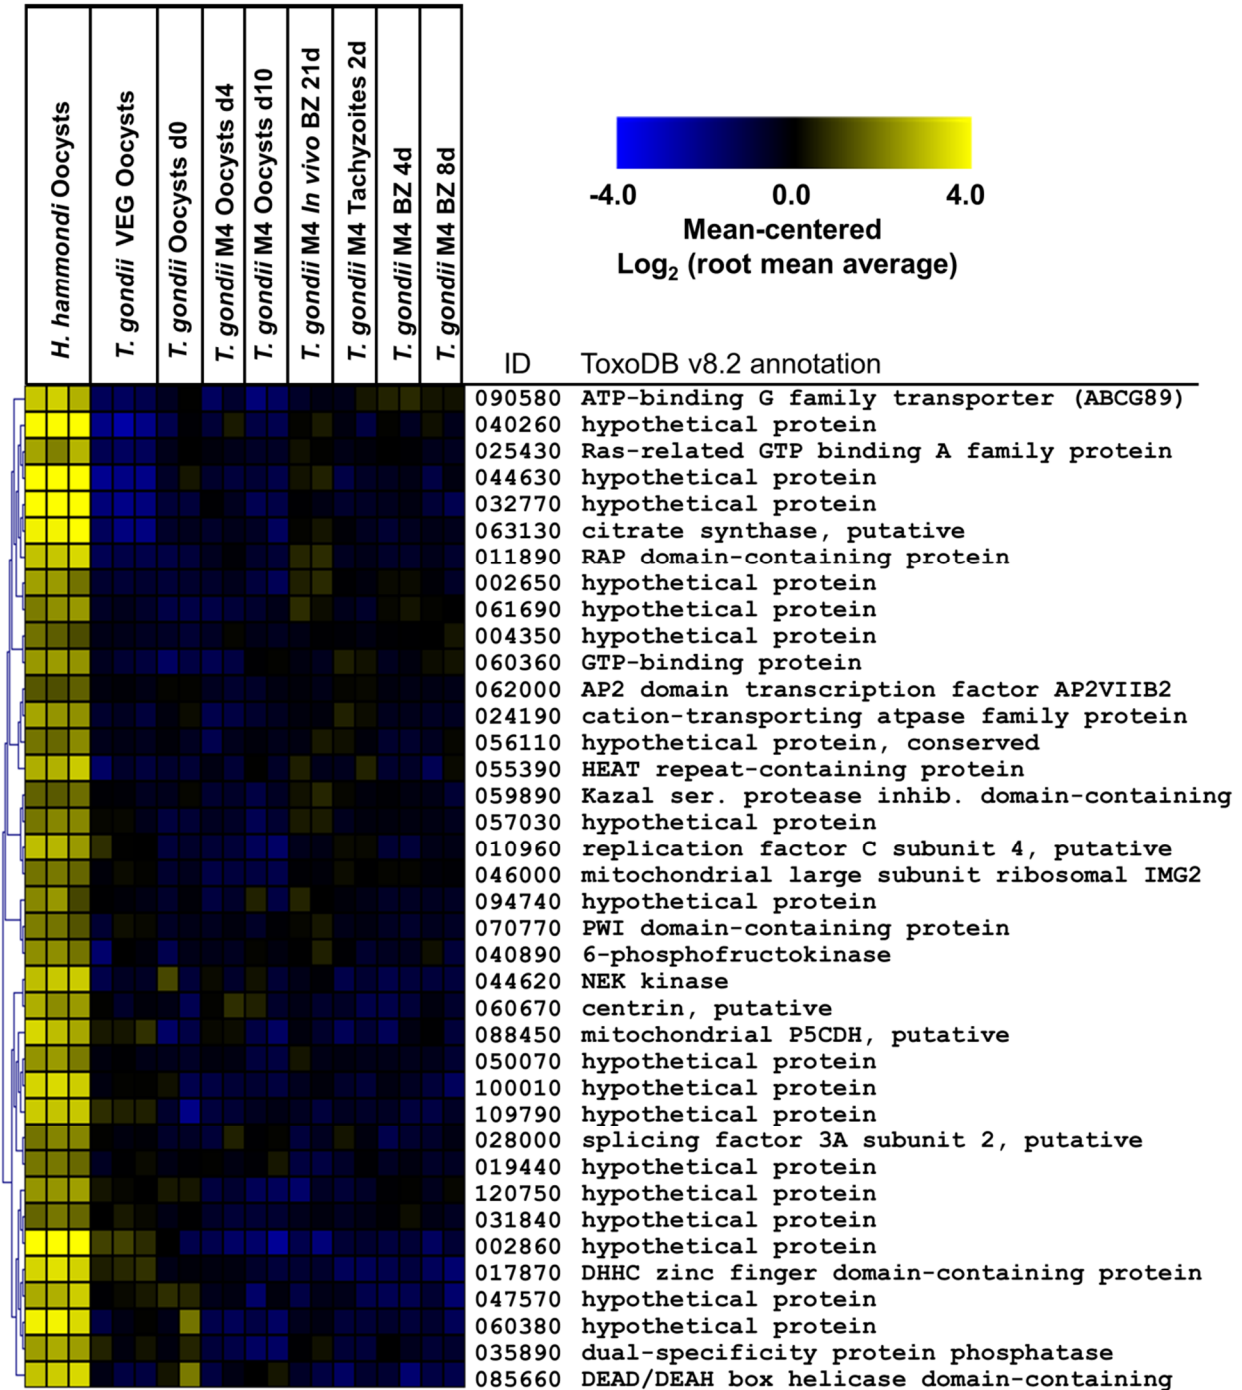

Figure S7. Heatmap of mean-centered, normalized data for *H. hammondi* HhGer041 and *T. gondii* VEG sporozoites showing genes with transcripts that were found to significantly (FDR  $P < 1 \times 10^{-5}$ ) match the template (using Pavlidis Template Matching; see Materials and Methods) of high transcript level in *H. hammondi* sporozoites but lower in *T. gondii* VEG sporozoites and all life stages for *T. gondii* strain M4.

S8.

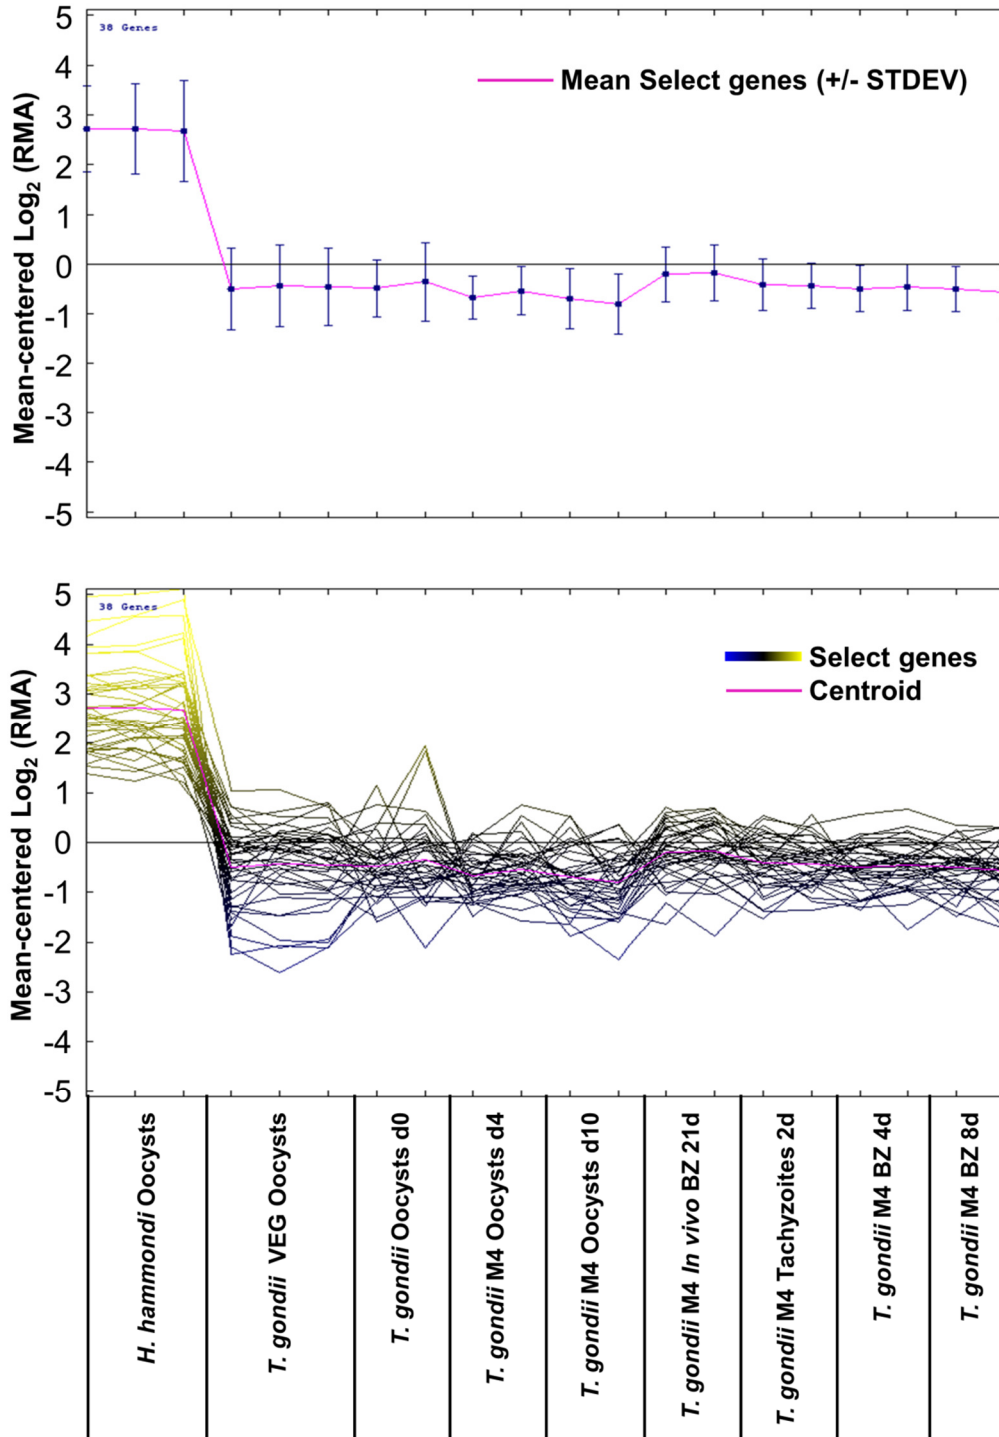

Figure S8. Mean +/- standard deviation (upper panel) or mean-centered hybridization intensity (lower panel) for all 38 genes shown in Fig. S7 in the *H. hammondi* and *T. gondii* sporozoite data obtained in the present study as well as that from the previously published dataset from *T. gondii* strain M4.



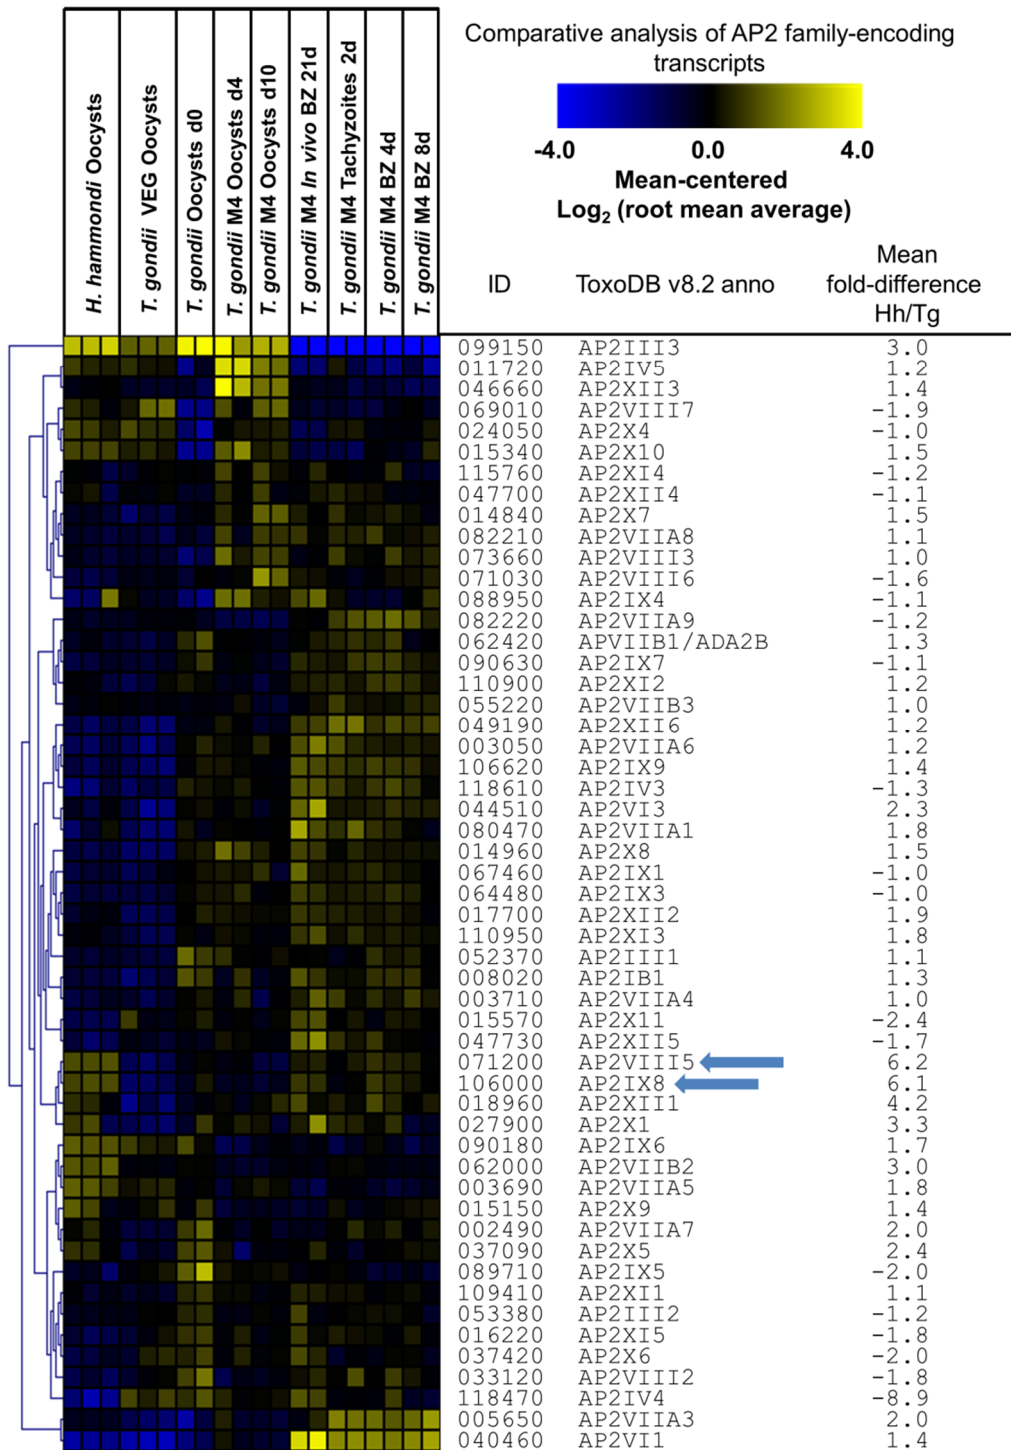

Figure S9. Heatmap of mean-centered, normalized data for *H. Hammondii* HhCatGer041 and *T. gondii* VEG sporozoites showing hybridization data for 53 genes annotated as AP2 transcription factors. Data are shown from multiple life cycle stages of *T. gondii* strain M4 for comparison. Blue arrowheads indicate two genes for which transcript abundance was > 6-fold higher in *H. Hammondii* compared to *T. gondii* VEG (discussed in the manuscript text).

**Table S1:** Raw luminescence values for *GRA15* and *ROP16* promoter assays

| <b>GRA15 Promoter Assays:</b>   |              |                |      |              |                |      |              |                |        |              |                |        |
|---------------------------------|--------------|----------------|------|--------------|----------------|------|--------------|----------------|--------|--------------|----------------|--------|
|                                 | <b>Rep 1</b> |                |      | <b>Rep 2</b> |                |      | <b>Rep 3</b> |                |        | <b>Rep 4</b> |                |        |
| <b>Firefly Construct</b>        | Firefly      | <i>Renilla</i> | F/R* | Firefly      | <i>Renilla</i> | F/R  | Firefly      | <i>Renilla</i> | F/R    | Firefly      | <i>Renilla</i> | F/R    |
| <b>None<sup>†</sup></b>         | ND           | ND             | ND   | ND           | ND             | ND   | 484          | 1887830        | 0.0003 | 722          | 1093746        | 0.0007 |
| <b><i>T. gondii</i> Type II</b> | 1547683      | 160438         | 9.7  | 1857258      | 161149         | 11.6 | 556312       | 44908          | 12.4   | 4206383      | 292684         | 10.23  |
| <b><i>H. hammondi</i></b>       | 432109       | 129232         | 3.3  | 1402270      | 571176         | 2.5  | 1358314      | 576972         | 2.4    | 2071420      | 999741         | 1.9    |
| <b>Fold <i>Tg:Hh</i></b>        |              |                | 2.9  |              |                | 4.7  |              |                | 5.3    |              |                | 5.4    |
| <b>Fold <i>Hh:None</i></b>      |              |                | ND   |              |                | ND   |              |                | 9183.0 |              |                | 2697.0 |

| <b>ROP16 Promoter Assays:</b>   |              |                |        |              |                |        |
|---------------------------------|--------------|----------------|--------|--------------|----------------|--------|
|                                 | <b>Rep 1</b> |                |        | <b>Rep 2</b> |                |        |
| <b>Firefly Construct</b>        | Firefly      | <i>Renilla</i> | F/R    | Firefly      | <i>Renilla</i> | F/R    |
| <b>None<sup>†</sup></b>         | 722          | 1025570        | 0.0007 | 564          | 2671755        | 0.0002 |
| <b><i>T. gondii</i> Type II</b> | 2394044      | 1669062        | 1.4    | 2540126      | 1340490        | 1.9    |
| <b><i>H. hammondi</i></b>       | 68987        | 1229397        | 0.056  | 92930        | 1289598        | 0.072  |
| <b>Fold <i>Tg:Hh</i></b>        |              |                | 25.6   |              |                | 26.3   |
| <b>Fold <i>Hh:None</i></b>      |              |                | 79.7   |              |                | 341.6  |

| <b>ROP16 Promoter deletion assays:</b> |              |                |       |              |                |       |              |                |       |
|----------------------------------------|--------------|----------------|-------|--------------|----------------|-------|--------------|----------------|-------|
|                                        | <b>Rep 1</b> |                |       | <b>Rep 2</b> |                |       | <b>Rep 3</b> |                |       |
| <b>Firefly Construct</b>               | Firefly      | <i>Renilla</i> | F/R   | Firefly      | <i>Renilla</i> | F/R   | Firefly      | <i>Renilla</i> | F/R   |
| <b>None</b>                            | ND           | ND             | ND    | 203          | 45993.5        | 0.004 | ND           | ND             | ND    |
| <b><i>T. gondii</i> Type II</b>        | 7350.5       | 70438          | 0.099 | 5416         | 24946.5        | 0.217 | 33167.5      | 145277         | 0.228 |
| <b><i>T. gondii</i> Type IIΔ16 bp</b>  | 488          | 20520          | 0.023 | 454          | 16493.5        | 0.028 | 6781         | 137115         | 0.049 |
| <b><i>H. hammondi</i></b>              | 586.5        | 57163          | 0.011 | 323          | 12740          | 0.025 | 2457         | 90171.5        | 0.027 |
| <b><i>H. hammondi</i> + 16 bp</b>      | 1438.5       | 30591          | 0.047 | 3160.5       | 40279.5        | 0.078 | 9066.5       | 78437.5        | 0.116 |

\*Firefly/*Renilla* signal ratio; <sup>†</sup>Parasites transfected with only the *Renilla* construct.

**Table S2.** Ten transcripts with the Gene Ontology term GO:0003735, "Structural Constituent of Ribosome" that are of greater abundance in *T. gondii* Sporulated Oocysts compared to *H. Hammondii* Sporulated Oocysts

| v8* ID | v7† ID | Genomic Location | Product Description      | Mean RMA‡<br><i>H. hammondi</i> | Mean RMA<br><i>T. gondii</i> | Fold-difference<br><i>Hh/Tg</i> |
|--------|--------|------------------|--------------------------|---------------------------------|------------------------------|---------------------------------|
| 238010 | 038010 | ME49 chrVI       | ribosomal protein RPL23A | 6.02                            | 9.79                         | -13.66                          |
| 242330 | 042330 | ME49 chrVI       | ribosomal protein RPS5   | 5.20                            | 10.62                        | -42.95                          |
| 239760 | 039760 | ME49 chrVI       | ribosomal protein RPL22  | 8.73                            | 13.04                        | -19.77                          |
| 238250 | 038250 | ME49 chrVI       | ribosomal protein RPL36  | 5.93                            | 9.49                         | -11.84                          |
| 203630 | 003630 | ME49 chrVIIa     | ribosomal protein RPL44  | 7.44                            | 10.87                        | -10.72                          |
| 262690 | 062690 | ME49 chrVIIb     | ribosomal protein RPL27  | 6.94                            | 11.85                        | -29.98                          |
| 232300 | 032300 | ME49 chrVIII     | ribosomal protein RPS3   | 8.64                            | 13.44                        | -27.84                          |
| 266060 | 066060 | ME49 chrIX       | ribosomal protein RPSA   | 9.30                            | 13.41                        | -17.32                          |
| 267060 | 067060 | ME49 chrIX       | ribosomal protein RPL14  | 8.24                            | 12.50                        | -19.08                          |
| 309120 | 109120 | ME49 chrXI       | ribosomal protein RPL4   | 6.76                            | 11.52                        | -27.02                          |

\*Current gene name based on version 8.2 of the *T. gondii* ME49 genome annotation; †Gene name based on version 7.3 of the *T. gondii* ME49 genome annotation; ‡Root mean average, determined as described in Materials and Methods. N=3 microarrays per species.
